# Supplementary material for: Mortality of Pandrug-Resistant Klebsiella pneumoniae Bloodstream Infections in Critically Ill Patients: A Retrospective Cohort of 115 Episodes
Source: PubMed Central journal article supplement (PMC7830393; doi:10.3390/antibiotics10010076), 2021-01-15

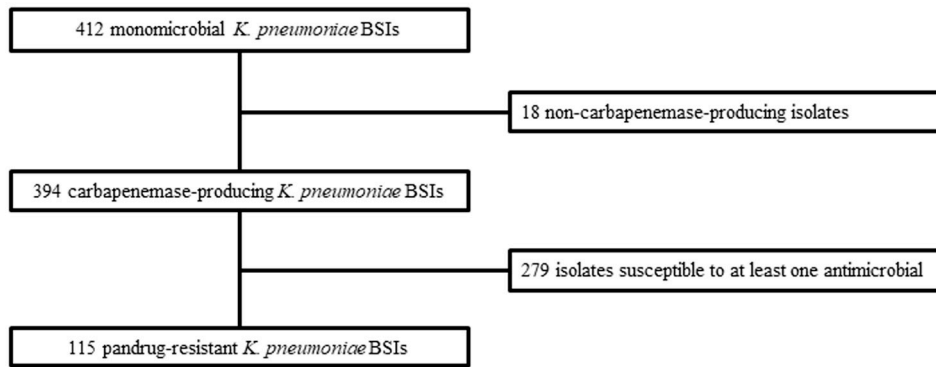

Supplement: antibiotics-10-00076-s001.pdf [file antibiotics-10-00076-s001.pdf]
